# Supplementary material
Source: publisher site journal article supplement (https://www.dovepress.com/get_supplementary_file.php?f=346128.docx)
Supplement: Supplementary file 1 [file get_supplementary_file.php]

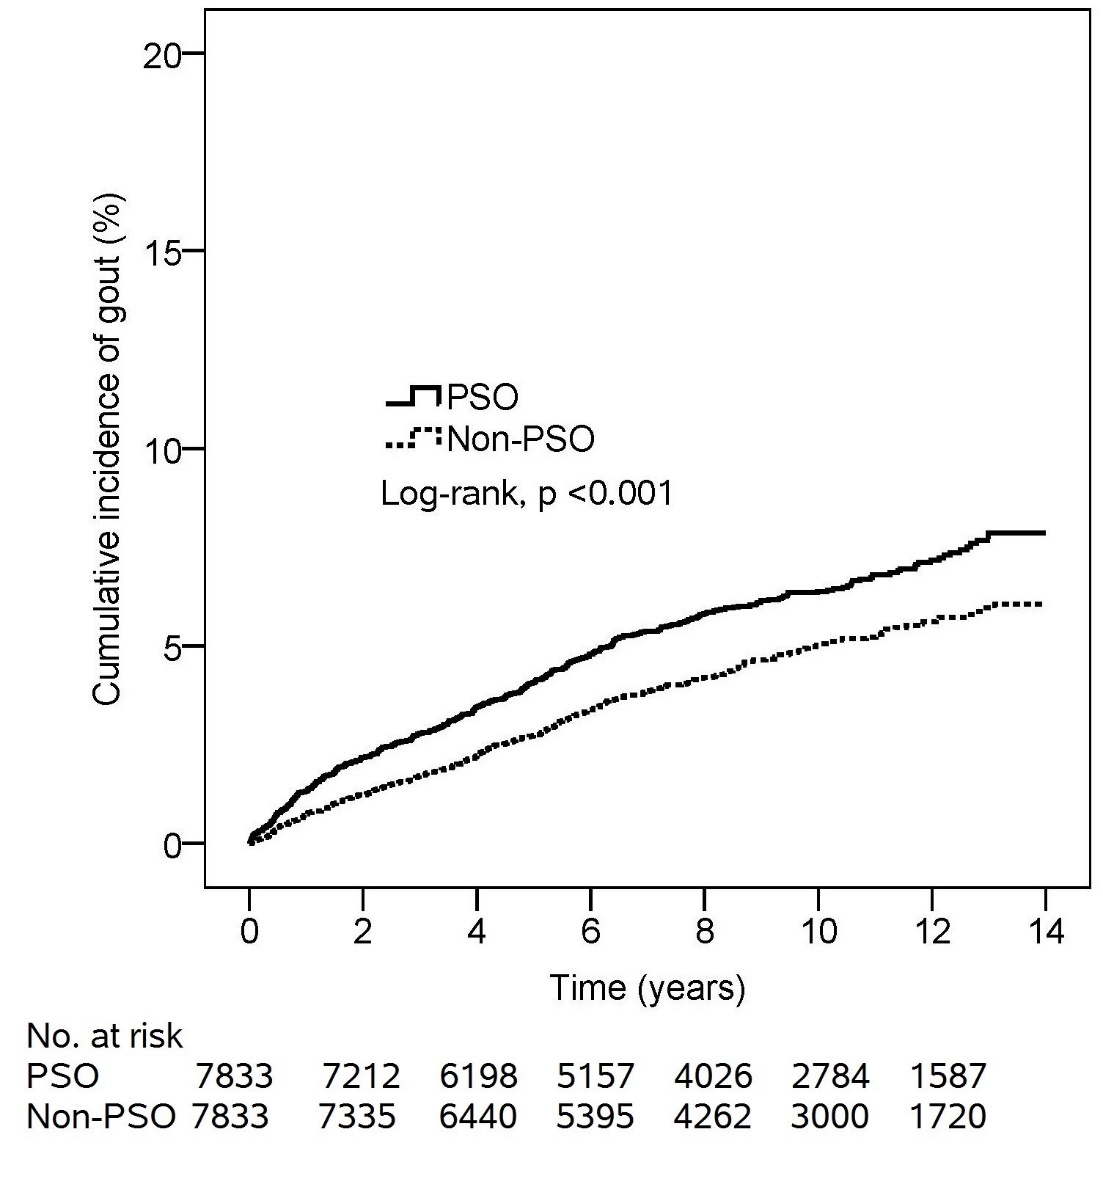


Figure S1 Cumulative incidence comparison of gout for the patient with or without psoriasis


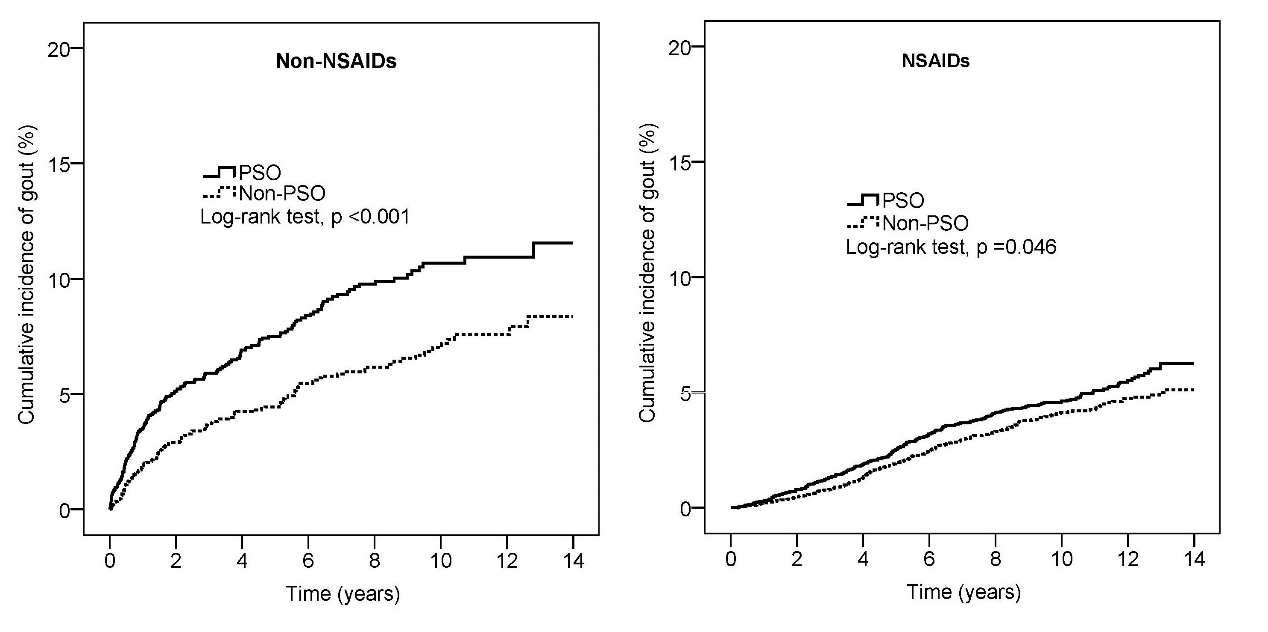


Figure S2 Kaplan-Meier curves stratified by NSAID use
